# Supplementary material
Source: Springer Nature journal article supplement (https://www.springermedizin.de/resource/supplementary/12885_2011_2935_MOESM4_ESM.pdf/9462314)
Supplement: MOESM4 [file 9462314]

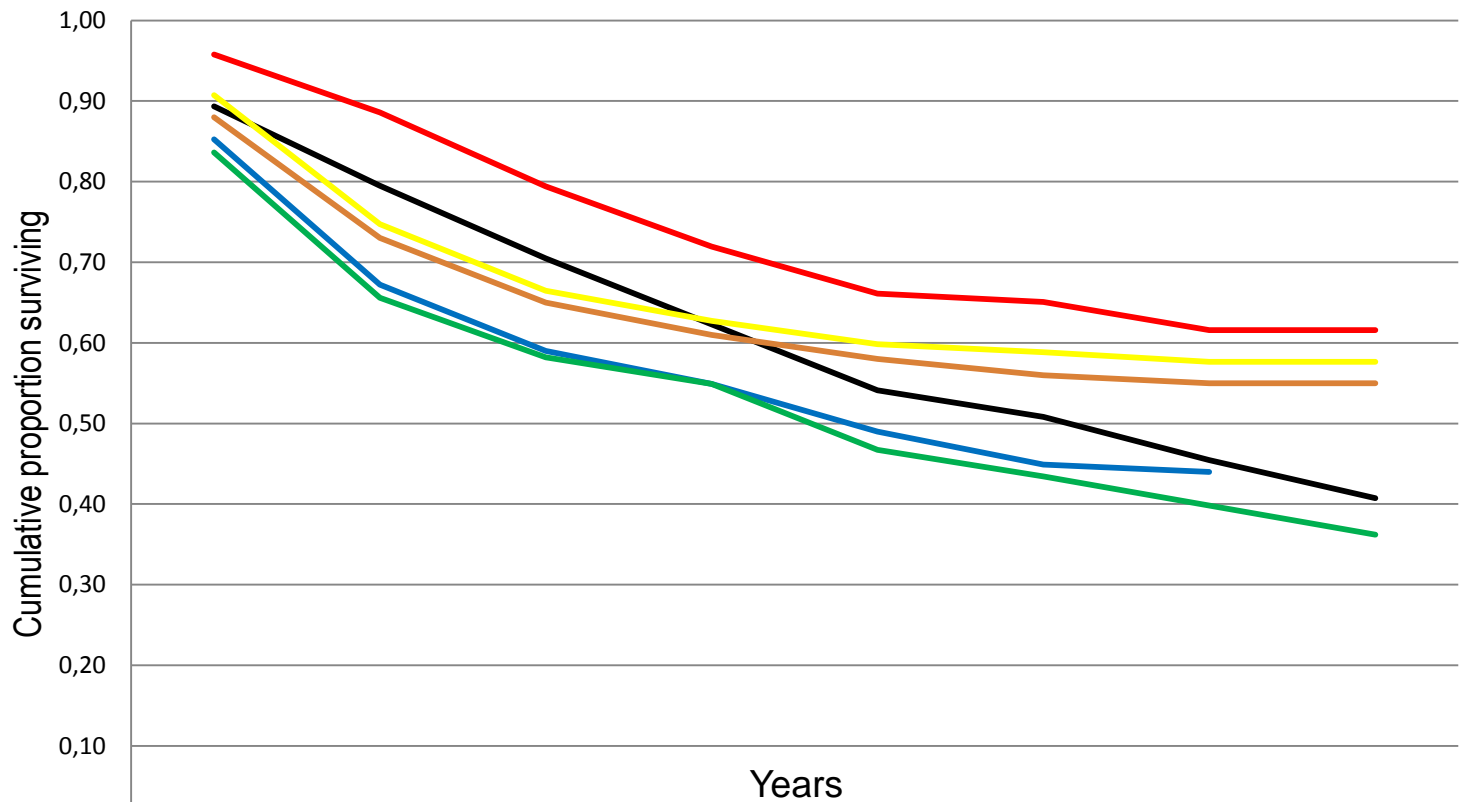

|                                           | 1    | 2    | 3    | 4    | 5    | 6    | 7    | 8    |
|-------------------------------------------|------|------|------|------|------|------|------|------|
| <span style="color: red;">—</span> CSS    | 0,96 | 0,89 | 0,79 | 0,72 | 0,66 | 0,65 | 0,62 | 0,62 |
| <span style="color: black;">—</span> OS   | 0,89 | 0,80 | 0,70 | 0,62 | 0,54 | 0,51 | 0,45 | 0,41 |
| <span style="color: yellow;">—</span> TTR | 0,91 | 0,75 | 0,66 | 0,63 | 0,60 | 0,59 | 0,58 | 0,58 |
| <span style="color: orange;">—</span> TTF | 0,88 | 0,73 | 0,65 | 0,61 | 0,58 | 0,56 | 0,55 | 0,55 |
| <span style="color: blue;">—</span> RFS   | 0,85 | 0,67 | 0,59 | 0,55 | 0,49 | 0,45 | 0,44 |      |
| <span style="color: green;">—</span> DFS  | 0,84 | 0,66 | 0,58 | 0,55 | 0,47 | 0,43 | 0,40 | 0,36 |
